# Supplementary material
Source: HighWire-hosted journal article supplement (https://bmjopen.bmj.com/content/13/2/e069075)
Supplement: inline-supplementary-material-1 [file inline-supplementary-material-1.pdf]

S1 Table. Interaction Effects Between Sickle Cell Disease Status and SES in Multivariate Regression Models

| Outcome                      | Interactions (SCD*SES)                     | Medical Conditions (past 12 months) |            |                      |           |              |                     |
|------------------------------|--------------------------------------------|-------------------------------------|------------|----------------------|-----------|--------------|---------------------|
|                              |                                            | Factor Levels                       | Odds Ratio | Linearized Std. Err. | t         | P> t         | [95%Conf. Interval] |
| <b>Anemia</b>                | Gender                                     | Female                              | Reference  | Reference            | Reference | Reference    | Reference           |
|                              |                                            | Male                                | 1.72       | 0.75                 | 1.24      | 0.216        | (0.73,4.04)         |
|                              | Age                                        | <3                                  | -          | -                    | -         | -            | -                   |
|                              |                                            | 3-5                                 | Reference  | Reference            | Reference | Reference    | Reference           |
|                              |                                            | 6-10                                | 1.55       | 1.11                 | 0.61      | 0.539        | (0.38,6.31)         |
|                              |                                            | 11-17                               | 1.13       | 0.79                 | 0.18      | 0.860        | (0.29,4.47)         |
|                              | Maternal Education                         | < High school                       | Reference  | Reference            | Reference | Reference    | Reference           |
|                              |                                            | High school/GED                     | 0.92       | 0.76                 | -0.10     | 0.918        | (0.18,4.69)         |
|                              |                                            | > High school                       | 1.47       | 0.96                 | 0.59      | 0.558        | (0.41,5.27)         |
|                              | Region                                     | Northeast                           | Reference  | Reference            | Reference | Reference    | Reference           |
|                              |                                            | Midwest                             | 0.30       | 0.24                 | -1.51     | 0.132        | (0.06,1.44)         |
|                              |                                            | South                               | 0.53       | 0.39                 | -0.87     | 0.384        | (0.13,2.22)         |
|                              |                                            | West                                | 0.75       | 0.77                 | -0.28     | 0.777        | (0.10,5.62)         |
|                              | Household Income (% federal poverty level) | <100                                | Reference  | Reference            | Reference | Reference    | Reference           |
|                              |                                            | 100 to < 200                        | 1.26       | 0.83                 | 0.36      | 0.720        | (0.35,4.55)         |
|                              |                                            | ≥ 200                               | 0.93       | 0.75                 | -0.09     | 0.932        | (0.19,4.52)         |
|                              | Race                                       | Other                               | Reference  | Reference            | Reference | Reference    | Reference           |
|                              |                                            | African American                    | 0.21       | 0.12                 | -2.64     | <b>0.008</b> | (0.07, 0.67)        |
|                              | Public Insurance Coverage                  | No                                  | Reference  | Reference            | Reference | Reference    | Reference           |
|                              |                                            | Yes                                 | 0.46       | 0.53                 | -0.67     | 0.501        | (0.05,4.40)         |
| Private Insurance            |                                            | No                                  | Reference  | Reference            | Reference | Reference    | Reference           |
|                              |                                            | Yes                                 | 2.30       | 2.65                 | 0.72      | 0.470        | (0.24,22.02)        |
| Other Insurance              |                                            | No                                  | Reference  | Reference            | Reference | Reference    | Reference           |
|                              |                                            | Yes                                 | 1.19       | 1.40                 | 0.15      | 0.889        | (0.12,11.93)        |
| No Insurance Coverage        | No                                         | Reference                           | Reference  | Reference            | Reference | Reference    |                     |
| Outcome                      | Interactions (SCD*SES)                     | Factor Levels                       | Odds Ratio | Linearized Std. Err. | t         | P> t         | [95%Conf. Interval] |
| <b>Respiratory Allergies</b> | Gender                                     | Female                              | Reference  | Reference            | Reference | Reference    | Reference           |
|                              |                                            | Male                                | 1.05       | 0.61                 | 0.09      | 0.932        | (0.33,3.31)         |
|                              | Age                                        | <3                                  | Reference  | Reference            | Reference | Reference    | Reference           |
|                              |                                            | 3-5                                 |            |                      |           |              |                     |
|                              |                                            | 6-10                                | 1.05       | 0.74                 | 0.07      | 0.944        | (0.26,4.22)         |
|                              |                                            | 11-17                               | 0.48       | 0.30                 | -1.15     | 0.249        | (0.14,1.67)         |
|                              | Maternal Education                         | < High school                       | Reference  | Reference            | Reference | Reference    | Reference           |
| High school/GED              |                                            | 1.27                                | 1.07       | 0.28                 | 0.778     | (0.24,6.68)  |                     |
| > High school                |                                            | 2.36                                | 2.03       | 1.00                 | 0.318     | (0.44,12.73) |                     |

|                                 |                                            |                      |                   |                             |           |                 |                            |
|---------------------------------|--------------------------------------------|----------------------|-------------------|-----------------------------|-----------|-----------------|----------------------------|
|                                 | Region                                     | Northeast            | Reference         | Reference                   | Reference | Reference       | Reference                  |
|                                 |                                            | Midwest              | 0.94              | 0.91                        | -0.06     | 0.951           | (0.14,6.28)                |
|                                 |                                            | South                | 0.53              | 0.54                        | -0.62     | 0.535           | (0.07,4.02)                |
|                                 |                                            | West                 | 0.13              | 0.19                        | -1.37     | 0.170           | (0.01,2.42)                |
|                                 | Household Income (% federal poverty level) | <100                 | Reference         | Reference                   | Reference | Reference       | Reference                  |
|                                 |                                            | 100 to < 200         | 0.47              | 0.40                        | -0.88     | 0.377           | (0.09,2.53)                |
|                                 |                                            | ≥ 200                | 0.56              | 0.64                        | -0.51     | 0.611           | (0.06,5.16)                |
|                                 | Race                                       | Other                | Reference         | Reference                   | Reference | Reference       | Reference                  |
|                                 |                                            | African American     | 0.63              | 0.51                        | -0.56     | 0.573           | (0.13,3.13)                |
|                                 | Public Insurance                           | No                   | Reference         | Reference                   | Reference | Reference       | Reference                  |
|                                 |                                            | Yes                  | 0.67              | 0.75                        | -0.36     | 0.722           | (0.08,5.96)                |
|                                 | Private Insurance                          | No                   | Reference         | Reference                   | Reference | Reference       | Reference                  |
|                                 |                                            | Yes                  | 0.29              | 0.40                        | -0.90     | 0.366           | (0.02,4.24)                |
|                                 | Other Insurance                            | No                   | Reference         | Reference                   | Reference | Reference       | Reference                  |
|                                 |                                            | Yes                  | 0.03              | 0.04                        | -2.77     | <b>0.006</b>    | (0.00,0.37)                |
|                                 | No Insurance Coverage                      | No                   | Reference         | Reference                   | Reference | Reference       | Reference                  |
|                                 |                                            | Yes                  | 5.37              | 7.00                        | 1.29      | 0.198           | (0.41,69.45)               |
| <b>Outcome</b>                  | <b>Interactions (SCD*SES)</b>              | <b>Factor Levels</b> | <b>Odds Ratio</b> | <b>Linearized Std. Err.</b> | <b>t</b>  | <b>P&gt; t </b> | <b>[95%Conf. Interval]</b> |
| <b>Food/Digestive Allergies</b> | Gender                                     | Female               | Reference         | Reference                   | Reference | Reference       | Reference                  |
|                                 |                                            | Male                 | 0.34              | 0.31                        | -1.17     | 0.24            | (0.05,2.07)                |
|                                 | Age                                        | <3                   | Reference         | Reference                   | Reference | Reference       | Reference                  |
|                                 |                                            | 3-5                  | -                 | -                           | -         | -               | -                          |
|                                 |                                            | 6-10                 | 0.30              | 0.32                        | -1.12     | 0.262           | (0.04,2.48)                |
|                                 |                                            | 11-17                | 0.16              | 0.17                        | -1.72     | 0.086           | (0.02, 1.29)               |
|                                 |                                            | Maternal Education   | < High school     | Reference                   | Reference | Reference       | Reference                  |
|                                 |                                            | High school/GED      | 11.51             | 20.87                       | 1.35      | 0.178           | (0.33,404.71)              |
|                                 |                                            | > High school        | 12.56             | 22.66                       | 1.40      | 0.161           | (0.36,433.34)              |
|                                 | Region                                     | Northeast            | Reference         | Reference                   | Reference | Reference       | Reference                  |
|                                 |                                            | Midwest              | 0.18              | 0.19                        | -1.65     | 0.100           | (0.02,1.40)                |
|                                 |                                            | South                | 0.16              | 0.17                        | -1.72     | 0.085           | (0.02,1.29)                |
|                                 |                                            | West                 | 0.76              | 1.34                        | -0.16     | 0.875           | (0.02,24.29)               |
|                                 | Household Income (% federal poverty level) | <100                 | Reference         | Reference                   | Reference | Reference       | Reference                  |
|                                 |                                            | 100 to < 200         | 0.77              | 0.87                        | -0.23     | 0.815           | (0.08,7.16)                |
|                                 |                                            | ≥ 200                | 0.06              | 0.08                        | -1.90     | 0.058           | (0.00,1.10)                |
|                                 | Race                                       | Other                | Reference         | Reference                   | Reference | Reference       | Reference                  |
| African American                |                                            | 0.21                 | 0.18              | -1.86                       | 0.06      | (0.04,1.09)     |                            |

|                                            |                                            |                      |                   |                             |           |                 |                            |
|--------------------------------------------|--------------------------------------------|----------------------|-------------------|-----------------------------|-----------|-----------------|----------------------------|
|                                            | Public Insurance                           | No                   | Reference         | Reference                   | Reference | Reference       | Reference                  |
|                                            | Private Insurance                          | Yes                  | 0.88              | 0.75                        | -0.15     | 0.881           | (0.17,4.65)                |
|                                            | Other Insurance                            | No                   | Reference         | Reference                   | Reference | Reference       | Reference                  |
|                                            | Other Insurance                            | Yes                  | 3.60              | 4.10                        | 1.13      | 0.261           | (0.39,33.61)               |
|                                            | Other Insurance                            | No                   | Reference         | Reference                   | Reference | Reference       | Reference                  |
|                                            | Other Insurance                            | Yes                  | 0.08              | 0.10                        | -2.09     | <b>0.037</b>    | (0.01,0.85)                |
|                                            | No Insurance Coverage                      | No                   | Reference         | Reference                   | Reference | Reference       | Reference                  |
|                                            | No Insurance Coverage                      | Yes                  | 7.10              | 10.12                       | 1.38      | 0.169           | (0.43,116.38)              |
| <b>Outcome</b>                             | <b>Interactions (SCD*SES)</b>              | <b>Factor Levels</b> | <b>Odds Ratio</b> | <b>Linearized Std. Err.</b> | <b>t</b>  | <b>P&gt; t </b> | <b>[95%Conf. Interval]</b> |
| <b>Frequent severe headaches/migraines</b> | Gender                                     | Female               | Reference         | Reference                   | Reference | Reference       | Reference                  |
|                                            |                                            | Male                 | 0.69              | 0.44                        | -0.58     | 0.559           | (0.20,2.42)                |
|                                            | Age                                        | <3                   | Reference         | Reference                   | Reference | Reference       | Reference                  |
|                                            |                                            | 3-5                  | -                 | -                           | -         | -               | -                          |
|                                            |                                            | 6-10                 | 0.44              | 0.52                        | -0.70     | 0.487           | (0.04,5.54)                |
|                                            |                                            | 11-17                | 0.25              | 0.32                        | -1.09     | 0.278           | (0.02,3.03)                |
|                                            | Maternal Education                         | < High school        | Reference         | Reference                   | Reference | Reference       | Reference                  |
|                                            |                                            | High school/GED      | 1.24              | 1.55                        | 0.17      | 0.864           | (0.11,14.48)               |
|                                            |                                            | > High school        | 2.14              | 1.84                        | 0.89      | 0.375           | (0.40,11.54)               |
|                                            | Region                                     | Northeast            | Reference         | Reference                   | Reference | Reference       | Reference                  |
|                                            |                                            | Midwest              | 0.39              | 0.35                        | -1.05     | 0.296           | (0.07,2.28)                |
|                                            |                                            | South                | 0.50              | 0.42                        | -0.83     | 0.404           | (0.10,2.56)                |
|                                            |                                            | West                 | 0.21              | 0.26                        | -1.28     | 0.202           | (0.02,2.30)                |
|                                            | Household Income (% federal poverty level) | <100                 | Reference         | Reference                   | Reference | Reference       | Reference                  |
|                                            |                                            | 100 to <200          | 0.56              | 0.57                        | -0.57     | 0.570           | (0.08,4.13)                |
|                                            |                                            | ≥ 200                | 1.42              | 1.30                        | 0.38      | 0.705           | (0.23,8.63)                |
|                                            | Race                                       | Other American       | Reference         | Reference                   | Reference | Reference       | Reference                  |
|                                            |                                            | African American     | 0.25              | 0.19                        | -1.80     | 0.072           | (0.06,1.13)                |
|                                            | Public Insurance                           | No                   | Reference         | Reference                   | Reference | Reference       | Reference                  |
|                                            |                                            | Yes                  | 0.43              | 0.68                        | -0.53     | 0.596           | (0.02,9.88)                |
|                                            | Private Insurance                          | No                   | Reference         | Reference                   | Reference | Reference       | Reference                  |
| Yes                                        |                                            | 0.40                 | 0.58              | -0.63                       | 0.530     | (0.02,7.18)     |                            |
| Other Insurance                            | No                                         | Reference            | Reference         | Reference                   | Reference | Reference       |                            |
|                                            | Yes                                        | 2.44                 | 3.50              | 0.62                        | 0.535     | (0.15,40.95)    |                            |
| No Insurance Coverage                      | No                                         | Reference            | Reference         | Reference                   | Reference | Reference       |                            |
|                                            | Yes                                        | 0.52                 | 0.99              | -0.34                       | 0.733     | (0.01,21.58)    |                            |
| <b>Outcome</b>                             | <b>Interactions (SCD*SES)</b>              | <b>Factor Levels</b> | <b>Odds Ratio</b> | <b>Linearized Std. Err.</b> | <b>t</b>  | <b>P&gt; t </b> | <b>[95%Conf. Interval]</b> |
| <b>Three or more ear infection</b>         | Gender                                     | Female               | Reference         | Reference                   | Reference | Reference       | Reference                  |
|                                            |                                            | Male                 | 0.21              | 0.28                        | -1.19     | 0.235           | (0.02,2.78)                |
|                                            | Age                                        | <3                   | Reference         | Reference                   | Reference | Reference       | Reference                  |
|                                            |                                            | 3-5                  | -                 | -                           | -         | -               | -                          |
|                                            |                                            | 6-10                 | 0.35              | 0.98                        | -0.38     | 0.707           | (0.00,78.82)               |
|                                            |                                            | 11-17                | 0.19              | 0.41                        | -0.79     | 0.432           | (0.00,11.66)               |

|                                            |                  |           |           |           |              |               |
|--------------------------------------------|------------------|-----------|-----------|-----------|--------------|---------------|
| Maternal Education                         | < High school    | Reference | Reference | Reference | Reference    | Reference     |
|                                            | High school/GED  | 0.76      | 0.85      | -0.25     | 0.803        | (0.08,6.90)   |
|                                            | > High school    | -         | -         | -         | -            | -             |
| Region                                     | Northeast        | Reference | Reference | Reference | Reference    | Reference     |
|                                            | Midwest          | 0.10      | 0.09      | -2.53     | <b>0.012</b> | (0.02,0.59)   |
|                                            | South            | -         | -         | -         | -            | -             |
|                                            | West             | -         | -         | -         | -            | -             |
| Household Income (% federal poverty level) | <100             | Reference | Reference | Reference | Reference    | Reference     |
|                                            | 100 to < 200     | 1.11      | 2.04      | 0.06      | 0.955        | (0.03,41.24)  |
|                                            | ≥ 200            | -         | -         | -         | -            | -             |
| Race                                       | Other            | Reference | Reference | Reference | Reference    | Reference     |
|                                            | African American | 0.05      | 0.10      | -1.60     | 0.109        | (0.00,1.93)   |
| Public Insurance                           | No               | Reference | Reference | Reference | Reference    | Reference     |
|                                            | Yes              | 0.72      | 1.32      | -0.18     | 0.856        | (0.02,26.31)  |
| Private Insurance                          | No               | Reference | Reference | Reference | Reference    | Reference     |
|                                            | Yes              | 2.15      | 6.00      | 0.27      | 0.784        | (0.01,513.75) |
| Other Insurance                            | No               | Reference | Reference | Reference | Reference    | Reference     |
|                                            | Yes              | 0.35      | 0.72      | -0.51     | 0.609        | (0.01,19.41)  |
| No Insurance Coverage                      | No               | Reference | Reference | Reference | Reference    | Reference     |
|                                            | Yes              | -         | -         | -         | -            | -             |

## Healthcare utilization

| Outcome                                                | Interactions (SCD*SES)                     | Factor Levels   | Odds Ratio | Linearized Std. Err. | t         | P> t         | [95%Conf. Interval] |
|--------------------------------------------------------|--------------------------------------------|-----------------|------------|----------------------|-----------|--------------|---------------------|
| Took prescription medication for at least three months | Gender                                     | Female          | Reference  | Reference            | Reference | Reference    | Reference           |
|                                                        |                                            | Male            | 2.95       | 0.14                 | -2.58     | <b>0.010</b> | (0.12,0.75)         |
|                                                        | Age                                        | <3              | Reference  | Reference            | Reference | Reference    | Reference           |
|                                                        |                                            | 3-5             | 0.24       | 0.17                 | -2.06     | <b>0.040</b> | (0.06,0.94)         |
|                                                        |                                            | 6-10            | 1.69       | 1.15                 | 0.78      | 0.437        | (0.45,6.39)         |
|                                                        |                                            | 11-17           | 0.13       | 0.08                 | -3.27     | <b>0.001</b> | (0.04,0.44)         |
|                                                        | Maternal Education                         | < High school   | Reference  | Reference            | Reference | Reference    | Reference           |
|                                                        |                                            | High school/GED | 0.42       | 0.30                 | -1.22     | 0.223        | (0.11,1.69)         |
|                                                        |                                            | > High school   | 1.13       | 0.70                 | 0.19      | 0.846        | (0.34,3.79)         |
|                                                        | Region                                     | Northeast       | Reference  | Reference            | Reference | Reference    | Reference           |
|                                                        |                                            | Midwest         | 0.77       | 0.61                 | -0.33     | 0.744        | (0.17,3.60)         |
|                                                        |                                            | South           | 0.73       | 0.57                 | -0.40     | 0.688        | (0.16,3.42)         |
|                                                        |                                            | West            | 0.90       | 0.94                 | -0.10     | 0.923        | (0.12,6.92)         |
|                                                        | Household Income (% federal poverty level) | <100            | Reference  | Reference            | Reference | Reference    | Reference           |
|                                                        |                                            | 100 to < 200    | 0.88       | 0.53                 | -0.21     | 0.835        | (0.27,2.89)         |
|                                                        |                                            | ≥ 200           | 0.64       | 0.45                 | -0.63     | 0.529        | (0.16,2.53)         |
| Race                                                   | Other                                      | Reference       | Reference  | Reference            | Reference | Reference    |                     |
|                                                        | African American                           | 2.91            | 1.68       | 1.85                 | 0.065     | (0.94,9.04)  |                     |

|                                                        | Public Insurance                           | No               | Reference  | Reference            | Reference | Reference    | Reference           |
|--------------------------------------------------------|--------------------------------------------|------------------|------------|----------------------|-----------|--------------|---------------------|
|                                                        | Private Insurance                          | Yes              | 1.03       | 0.86                 | 0.04      | 0.972        | (0.20,5.35)         |
|                                                        | Other Insurance                            | No               | Reference  | Reference            | Reference | Reference    | Reference           |
|                                                        | Other Insurance                            | Yes              | 1.56       | 1.51                 | 0.46      | 0.643        | (0.24,10.40)        |
|                                                        | Other Insurance                            | No               | Reference  | Reference            | Reference | Reference    | Reference           |
|                                                        | Other Insurance                            | Yes              | 1.73       | 1.82                 | 0.52      | 0.601        | (0.22,13.62)        |
|                                                        | No Insurance                               | No               | Reference  | Reference            | Reference | Reference    | Reference           |
|                                                        | No Insurance                               | Yes              | 3.31       | 3.39                 | 1.17      | 0.243        | (0.44,24.71)        |
|                                                        | Coverage                                   |                  |            |                      |           |              |                     |
| How many times have you seen a doctor (past 12 months) |                                            |                  |            |                      |           |              |                     |
| Outcome                                                | Interactions (SCD*SES)                     | Factor Levels    | Odds Ratio | Linearized Std. Err. | t         | P> t         | [95%Conf. Interval] |
| # of Doctors visit: none                               | Gender                                     | Female           | Reference  | Reference            | Reference | Reference    | Reference           |
|                                                        |                                            | Male             | 52.70      | 139.47               | 1.50      | 0.134        | (0.30,9497.22)      |
|                                                        | Age                                        | <3               | Reference  | Reference            | Reference | Reference    | Reference           |
|                                                        |                                            | 3-5              | 0.01       | 0.02                 | -1.77     | 0.077        | (0.00,1.70)         |
|                                                        |                                            | 6-10             | -          | -                    | -         | -            | -                   |
|                                                        |                                            | 11-17            | -          | -                    | -         | -            | -                   |
|                                                        | Maternal Education                         | < High school    | Reference  | Reference            | Reference | Reference    | Reference           |
|                                                        |                                            | High school/GED  | 52.17      | 103.97               | 1.98      | <b>0.048</b> | (1.04,2606.64)      |
|                                                        |                                            | > High school    | 126.35     | 296.95               | 2.06      | <b>0.040</b> | (1.25,12731.69)     |
|                                                        | Region                                     | Northeast        | Reference  | Reference            | Reference | Reference    | Reference           |
|                                                        |                                            | Midwest          | 0.11       | 0.09                 | -2.71     | <b>0.007</b> | (0.02,0.55)         |
|                                                        |                                            | South            | -          | -                    | -         | -            | -                   |
|                                                        |                                            | West             | -          | -                    | -         | -            | -                   |
|                                                        | Household Income (% federal poverty level) | <100             | Reference  | Reference            | Reference | Reference    | Reference           |
|                                                        |                                            | 100 to <200      | 4.34       | 7.66                 | 0.83      | 0.405        | (0.14,138.40)       |
|                                                        |                                            | ≥ 200            | -          | -                    | -         | -            | -                   |
|                                                        | Race                                       | Other            | Reference  | Reference            | Reference | Reference    | Reference           |
|                                                        |                                            | African American | -          | -                    | -         | -            | -                   |
|                                                        | Public Insurance                           | No               | Reference  | Reference            | Reference | Reference    | Reference           |
|                                                        |                                            | Yes              | -          | -                    | -         | -            | -                   |
|                                                        | Private Insurance                          | No               | Reference  | Reference            | Reference | Reference    | Reference           |
| Yes                                                    |                                            | -                | -          | -                    | -         | -            |                     |
| Other Insurance                                        | No                                         | Reference        | Reference  | Reference            | Reference | Reference    |                     |
|                                                        | Yes                                        | -                | -          | -                    | -         | -            |                     |
| No Insurance                                           | No                                         | Reference        | Reference  | Reference            | Reference | Reference    |                     |
|                                                        | Yes                                        | -                | -          | -                    | -         | -            |                     |
|                                                        | Coverage                                   |                  |            |                      |           |              |                     |
| Outcome                                                | Interactions (SCD*SES)                     | Factor Levels    | Odds Ratio | Linearized Std. Err. | t         | P> t         | [95%Conf. Interval] |
| # of Doctors visit: 1-5                                | Gender                                     | Female           | Reference  | Reference            | Reference | Reference    | Reference           |
|                                                        |                                            | Male             | 0.89       | 0.41                 | -0.25     | 0.802        | (0.36,2.18)         |
|                                                        | Age                                        | <3               | Reference  | Reference            | Reference | Reference    | Reference           |
|                                                        |                                            | 3-5              | 0.73       | 0.48                 | -0.48     | 0.628        | (0.20,2.66)         |
|                                                        |                                            | 6-10             | 0.76       | 0.51                 | -0.41     | 0.678        | (0.20,2.83)         |
|                                                        |                                            | 11-17            | 1.32       | 0.76                 | 0.48      | 0.632        | (0.42,4.11)         |

|                                | Maternal Education                         | < High school    | Reference  | Reference            | Reference | Reference    | Reference           |
|--------------------------------|--------------------------------------------|------------------|------------|----------------------|-----------|--------------|---------------------|
|                                |                                            | High school/GED  | 0.69       | 0.41                 | -0.62     | 0.535        | (0.22,2.21)         |
|                                |                                            | > High school    | 0.44       | 0.25                 | -1.43     | 0.153        | (0.14,1.36)         |
|                                | Region                                     | Northeast        | Reference  | Reference            | Reference | Reference    | Reference           |
|                                |                                            | Midwest          | 3.42       | 2.41                 | 1.75      | 0.081        | (0.86,13.63)        |
|                                |                                            | South            | 3.82       | 2.42                 | 2.12      | <b>0.034</b> | (1.10,13.24)        |
|                                |                                            | West             | 2.64       | 2.84                 | 0.90      | 0.368        | (0.32,21.88)        |
|                                | Household Income (% federal poverty level) | <100             | Reference  | Reference            | Reference | Reference    | Reference           |
|                                |                                            | 100 to < 200     | 0.32       | 0.18                 | -1.99     | <b>0.046</b> | (0.10,0.98)         |
|                                |                                            | ≥ 200            | 0.34       | 0.23                 | -1.57     | 0.118        | (0.09,1.32)         |
|                                | Race                                       | Other            | Reference  | Reference            | Reference | Reference    | Reference           |
|                                |                                            | African American | 1.14       | 0.69                 | 0.21      | 0.834        | (0.34,3.75)         |
|                                | Public Insurance                           | No               | Reference  | Reference            | Reference | Reference    | Reference           |
|                                |                                            | Yes              | 0.51       | 0.44                 | -0.77     | 0.440        | (0.09,2.82)         |
|                                | Private Insurance                          | No               | Reference  | Reference            | Reference | Reference    | Reference           |
|                                |                                            | Yes              | 2.43       | 2.37                 | 0.91      | 0.364        | (0.36,16.46)        |
|                                | Other Insurance                            | No               | Reference  | Reference            | Reference | Reference    | Reference           |
|                                |                                            | Yes              | 0.63       | 0.60                 | -0.49     | 0.627        | (0.10,4.10)         |
|                                | No Insurance Coverage                      | No               | Reference  | Reference            | Reference | Reference    | Reference           |
|                                |                                            | Yes              | 0.89       | 0.97                 | -0.11     | 0.916        | (0.10,7.56)         |
| Outcome                        | Interactions (SCD*SES)                     | Factor Levels    | Odds Ratio | Linearized Std. Err. | t         | P> t         | [95%Conf. Interval] |
| <b># of Doctors visit: 6-9</b> | Gender                                     | Female           | Reference  | Reference            | Reference | Reference    | Reference           |
|                                |                                            | Male             | 1.31       | 0.76                 | 0.46      | 0.642        | (0.42,4.08)         |
|                                | Age                                        | <3               | Reference  | Reference            | Reference | Reference    | Reference           |
|                                |                                            | 3-5              | 4.58       | 3.24                 | 2.15      | <b>0.032</b> | (1.14,18.39)        |
|                                |                                            | 6-10             | 9.19       | 6.56                 | 3.11      | <b>0.002</b> | (2.26,37.29)        |
|                                |                                            | 11-17            | 2.59       | 1.84                 | 1.34      | 0.180        | (0.64,10.44)        |
|                                | Maternal Education                         | < High school    | Reference  | Reference            | Reference | Reference    | Reference           |
|                                |                                            | High school/GED  | 0.85       | 0.62                 | -0.23     | 0.822        | (0.20,3.60)         |
|                                |                                            | > High school    | 0.51       | 0.34                 | -0.99     | 0.322        | (0.14,1.92)         |
|                                | Region                                     | Northeast        | Reference  | Reference            | Reference | Reference    | Reference           |
|                                |                                            | Midwest          | 0.13       | 0.12                 | -2.33     | <b>0.020</b> | (0.02,0.73)         |
|                                |                                            | South            | 0.12       | 0.10                 | -2.65     | <b>0.008</b> | (0.02,0.58)         |
|                                |                                            | West             | 0.30       | 0.34                 | -1.05     | 0.292        | (0.03,2.81)         |
|                                | Household Income (% federal poverty level) | <100             | Reference  | Reference            | Reference | Reference    | Reference           |
|                                |                                            | 100 to < 200     | 2.38       | 1.61                 | 1.28      | 0.201        | (0.63,9.01)         |
|                                |                                            | ≥ 200            | 3.09       | 2.42                 | 1.44      | 0.150        | (0.67,14.37)        |
|                                | Race                                       | Other            | Reference  | Reference            | Reference | Reference    | Reference           |
|                                |                                            | African American | 0.78       | 0.58                 | -0.34     | 0.734        | (0.18,3.36)         |
|                                | Public                                     | No               | Reference  | Reference            | Reference | Reference    | Reference           |

|                                  | Insurance                                  | Yes              | 2.51       | 2.14                 | 1.08      | 0.280        | (0.47,13.36)        |
|----------------------------------|--------------------------------------------|------------------|------------|----------------------|-----------|--------------|---------------------|
|                                  | Private                                    | No               | Reference  | Reference            | Reference | Reference    | Reference           |
|                                  | Insurance                                  | Yes              | 0.64       | 0.59                 | -0.49     | 0.624        | (0.10,3.89)         |
|                                  | Other                                      | No               | Reference  | Reference            | Reference | Reference    | Reference           |
|                                  | Insurance                                  | Yes              | 0.46       | 0.51                 | -0.71     | 0.479        | (0.05,4.03)         |
|                                  | No                                         | No               | Reference  | Reference            | Reference | Reference    | Reference           |
|                                  | Insurance                                  | Yes              | 7.40       | 8.87                 | 1.67      | 0.096        | (0.70,77.88)        |
|                                  | Coverage                                   |                  |            |                      |           |              |                     |
| Outcome                          | Interactions (SCD*SES)                     | Factor Levels    | Odds Ratio | Linearized Std. Err. | t         | P> t         | [95%Conf. Interval] |
| <b># of Doctors visit: 10-15</b> | Gender                                     | Female           | Reference  | Reference            | Reference | Reference    | Reference           |
|                                  |                                            | Male             | 0.66       | 0.60                 | -0.46     | 0.647        | (0.11,3.98)         |
|                                  | Age                                        | <3               | Reference  | Reference            | Reference | Reference    | Reference           |
|                                  |                                            | 3-5              | 0.34       | 0.32                 | -1.16     | 0.246        | (0.05,2.10)         |
|                                  |                                            | 6-10             | 0.16       | 0.15                 | -1.99     | <b>0.047</b> | (0.03,0.97)         |
|                                  |                                            | 11-17            | 0.09       | 0.11                 | -2.00     | <b>0.046</b> | (0.10,0.95)         |
|                                  | Maternal Education                         | < High school    | Reference  | Reference            | Reference | Reference    | Reference           |
|                                  |                                            | High school/GED  | 4.14       | 7.02                 | 0.84      | 0.402        | (0.15,116.44)       |
|                                  |                                            | > High school    | 23.45      | 42.07                | 1.76      | 0.079        | (0.69,792.87)       |
|                                  | Region                                     | Northeast        | Reference  | Reference            | Reference | Reference    | Reference           |
|                                  |                                            | Midwest          | 2.94       | 2.84                 | 1.12      | 0.264        | (0.44,19.53)        |
|                                  |                                            | South            | 1.82       | 1.88                 | 0.57      | 0.565        | (0.24,13.92)        |
|                                  |                                            | West             | 1.27       | 2.39                 | 0.13      | 0.898        | (0.03,50.96)        |
|                                  | Household Income (% federal poverty level) | <100             | Reference  | Reference            | Reference | Reference    | Reference           |
|                                  |                                            | 100 to < 200     | 4.31       | 4.42                 | 1.43      | 0.153        | (0.58,32.22)        |
|                                  |                                            | ≥ 200            | 1.59       | 1.44                 | 0.51      | 0.608        | (0.27,9.40)         |
|                                  | Race                                       | Other            | Reference  | Reference            | Reference | Reference    | Reference           |
|                                  |                                            | African American | 1.42       | 1.59                 | 0.31      | 0.758        | (0.16,12.90)        |
|                                  | Public Insurance                           | No               | Reference  | Reference            | Reference | Reference    | Reference           |
|                                  |                                            | Yes              | 0.13       | 0.14                 | -1.96     | 0.051        | (0.02,1.01)         |
|                                  |                                            | Private          | No         | Reference            | Reference | Reference    | Reference           |
| Insurance                        |                                            | Yes              | 0.27       | 0.28                 | -1.28     | 0.202        | (0.04,2.03)         |
| Other                            |                                            | No               | Reference  | Reference            | Reference | Reference    | Reference           |
| Insurance                        |                                            | Yes              | 0.30       | 0.38                 | -0.94     | 0.348        | (0.02,3.67)         |
| No                               |                                            | No               | Reference  | Reference            | Reference | Reference    | Reference           |
| Insurance                        | Yes                                        | 1.61             | 2.45       | 0.31                 | 0.756     | (0.08,32.13) |                     |
|                                  | Coverage                                   |                  |            |                      |           |              |                     |

| Multiple visits to emergency room                |                        |               |            |                      |           |              |                     |
|--------------------------------------------------|------------------------|---------------|------------|----------------------|-----------|--------------|---------------------|
| Outcome                                          | Interactions (SCD*SES) | Factor Levels | Odds Ratio | Linearized Std. Err. | t         | P> t         | [95%Conf. Interval] |
| <b>Had surgery or another surgical procedure</b> | Gender                 | Female        | Reference  | Reference            | Reference | Reference    | Reference           |
|                                                  |                        | Male          | 15.47      | 16.92                | 2.51      | <b>0.012</b> | (1.81,132.27)       |
|                                                  | Age                    | <3            | Reference  | Reference            | Reference | Reference    | Reference           |
|                                                  |                        | 3-5           | 1.55       | 1.68                 | 0.40      | 0.689        | (0.18,13.10)        |
|                                                  |                        | 6-10          | 4.29       | 4.84                 | 1.29      | 0.196        | (0.47,39.24)        |
|                                                  |                        | 11-17         | 1.41       | 1.65                 | 0.30      | 0.767        | (0.14,13.97)        |
|                                                  | Maternal Education     | < High school | Reference  | Reference            | Reference | Reference    | Reference           |

|                                           |                                            | High school/GED | 6.68       | 13.58                | 0.93      | 0.351        | (0.12,361.89)       |
|-------------------------------------------|--------------------------------------------|-----------------|------------|----------------------|-----------|--------------|---------------------|
|                                           |                                            | > High school   | 0.45       | 0.78                 | -0.46     | 0.645        | (0.01,13.94)        |
|                                           | Region                                     | Northeast       | Reference  | Reference            | Reference | Reference    | Reference           |
|                                           |                                            | Midwest         | 0.86       | 0.72                 | -0.18     | 0.861        | (0.17,4.46)         |
|                                           |                                            | South           | -          | -                    | -         | -            | -                   |
|                                           |                                            | West            | -          | -                    | -         | -            | -                   |
|                                           | Household Income (% federal poverty level) | <100            | Reference  | Reference            | Reference | Reference    | Reference           |
|                                           |                                            | 100 to <200     | 0.09       | 0.11                 | -1.87     | <b>0.061</b> | (0.00,1.12)         |
|                                           |                                            | ≥ 200           | 21.22      | 28.16                | 2.30      | <b>0.022</b> | (1.57,287.05)       |
|                                           | Race                                       | Other           | Reference  | Reference            | Reference | Reference    | Reference           |
|                                           |                                            | Black           | 0.31       | 0.32                 | -1.13     | 0.258        | (0.04,2.34)         |
|                                           | Public Insurance                           | No              | Reference  | Reference            | Reference | Reference    | Reference           |
|                                           |                                            | Yes             | <0.01      | <0.01                | -3.18     | <b>0.002</b> | (0.00,0.13)         |
|                                           | Private Insurance                          | No              | Reference  | Reference            | Reference | Reference    | Reference           |
|                                           |                                            | Yes             | <0.01      | 0.01                 | -3.27     | <b>0.001</b> | (0.00,0.10)         |
|                                           | Other Insurance                            | No              | Reference  | Reference            | Reference | Reference    | Reference           |
|                                           |                                            | Yes             | 0.34       | 0.80                 | -0.46     | 0.645        | (0.00,32.74)        |
|                                           | No Insurance Coverage                      | No              | Reference  | Reference            | Reference | Reference    | Reference           |
|                                           |                                            | Yes             | 0.11       | 0.15                 | -1.65     | 0.100        | (0.00,1.52)         |
| Outcome                                   | Interactions (SCD*SES)                     | Factor Levels   | Odds Ratio | Linearized Std. Err. | t         | P> t         | [95%Conf. Interval] |
| <b># of Visits to emergency room:none</b> | Gender                                     | Female          | Reference  | Reference            | Reference | Reference    | Reference           |
|                                           |                                            | Male            | 1.03       | 0.50                 | 0.05      | 0.957        | (0.39,2.68)         |
|                                           | Age                                        | <3              | Reference  | Reference            | Reference | Reference    | Reference           |
|                                           |                                            | 3-5             | 0.99       | 0.70                 | -0.02     | 0.985        | (0.24,3.98)         |
|                                           |                                            | 6-10            | 1.27       | 0.91                 | 0.34      | 0.734        | (0.32,5.14)         |
|                                           |                                            | 11-17           | 5.00       | 3.62                 | 2.23      | <b>0.026</b> | (1.21,20.69)        |
|                                           | Maternal Education                         | < High school   | Reference  | Reference            | Reference | Reference    | Reference           |
|                                           |                                            | High school/GED | 4.33       | 2.84                 | 2.23      | <b>0.026</b> | (1.19,15.70)        |
|                                           |                                            | > High school   | 2.34       | 1.41                 | 1.42      | 0.157        | (0.72,7.64)         |
|                                           | Region                                     | Northeast       | Reference  | Reference            | Reference | Reference    | Reference           |
|                                           |                                            | Midwest         | 1.10       | 0.83                 | 0.13      | 0.896        | (0.25,4.81)         |
|                                           |                                            | South           | 0.84       | 0.57                 | -0.25     | 0.801        | (0.23,3.16)         |
|                                           |                                            | West            | 1.56       | 1.72                 | 0.41      | 0.684        | (0.18,13.55)        |
|                                           | Household Income (% federal poverty level) | <100            | Reference  | Reference            | Reference | Reference    | Reference           |
|                                           |                                            | 100 to <200     | 0.47       | 0.26                 | -1.38     | 0.169        | (0.16,1.38)         |
|                                           |                                            | ≥ 200           | 0.59       | 0.41                 | -0.76     | 0.447        | (0.15,2.29)         |
|                                           | Race                                       | Other           | Reference  | Reference            | Reference | Reference    | Reference           |
|                                           |                                            | Black           | 0.45       | 0.31                 | -1.16     | 0.245        | (0.11,1.74)         |
|                                           | Public Insurance                           | No              | Reference  | Reference            | Reference | Reference    | Reference           |
|                                           |                                            | Yes             | 0.33       | 0.35                 | -1.05     | 0.293        | (0.04,2.60)         |
|                                           | Private Insurance                          | No              | Reference  | Reference            | Reference | Reference    | Reference           |
|                                           | Yes                                        | 0.22            | 0.24       | -1.40                | 0.161     | (0.03,1.83)  |                     |
| Other Insurance                           | No                                         | Reference       | Reference  | Reference            | Reference | Reference    |                     |



|                                    | Insurance                                  | Yes             | 0.87       | 1.03                 | -0.12     | 0.907         | (0.09,8.83)         |
|------------------------------------|--------------------------------------------|-----------------|------------|----------------------|-----------|---------------|---------------------|
|                                    | No                                         | No              | Reference  | Reference            | Reference | Reference     | Reference           |
|                                    | Insurance                                  | Yes             | 0.13       | 0.16                 | -1.68     | <b>0.094</b>  | (0.02,1.41)         |
|                                    | Coverage                                   |                 |            |                      |           |               |                     |
| Outcome                            | Interactions (SCD*SES)                     | Factor Levels   | Odds Ratio | Linearized Std. Err. | t         | P> t          | [95%Conf. Interval] |
| # of Visits to emergency room: 1   | Gender                                     | Female          | Reference  | Reference            | Reference | Reference     | Reference           |
|                                    |                                            | Male            | 2.82       | 1.87                 | 1.56      | 0.119         | (0.77,10.35)        |
|                                    | Age                                        | <3              | Reference  | Reference            | Reference | Reference     | Reference           |
|                                    |                                            | 3-5             | 0.63       | 0.53                 | -0.55     | 0.584         | (0.12,3.23)         |
|                                    |                                            | 6-10            | 0.49       | 0.38                 | -0.91     | 0.365         | (0.11,2.27)         |
|                                    |                                            | 11-17           | 0.51       | 0.34                 | -1.00     | 0.318         | (0.14,1.91)         |
|                                    | Maternal Education                         | < High school   | Reference  | Reference            | Reference | Reference     | Reference           |
|                                    |                                            | High school/GED | 0.16       | 0.11                 | -2.58     | <b>0.010</b>  | (0.04,0.65)         |
|                                    |                                            | > High school   | 0.16       | 0.10                 | -2.97     | <b>0.003</b>  | (0.05,0.53)         |
|                                    | Region                                     | Northeast       | Reference  | Reference            | Reference | Reference     | Reference           |
|                                    |                                            | Midwest         | 0.05       | 0.06                 | -2.46     | <b>0.014</b>  | (0.01,0.55)         |
|                                    |                                            | South           | 0.18       | 0.16                 | -1.89     | <b>0.059</b>  | (0.03,1.07)         |
|                                    |                                            | West            | 0.02       | 0.04                 | -2.03     | <b>0.043</b>  | (0.00,0.88)         |
|                                    | Household Income (% federal poverty level) | <100            | Reference  | Reference            | Reference | Reference     | Reference           |
|                                    |                                            | 100 to < 200    | 4.69       | 3.64                 | 1.99      | <b>0.047</b>  | (1.02,21.54)        |
|                                    |                                            | ≥ 200           | 4.57       | 4.34                 | 1.60      | 0.110         | (0.71,29.54)        |
|                                    | Race                                       | Other           | Reference  | Reference            | Reference | Reference     | Reference           |
|                                    |                                            | Black           | 2.20       | 1.96                 | 0.89      | 0.375         | (0.38,12.61)        |
|                                    | Public Insurance                           | No              | Reference  | Reference            | Reference | Reference     | Reference           |
|                                    | Private Insurance                          | Yes             | 7.90       | 11.85                | 1.38      | 0.169         | (0.42,150.18)       |
|                                    | Other Insurance                            | No              | Reference  | Reference            | Reference | Reference     | Reference           |
| Private Insurance                  | Yes                                        | 1.52            | 2.43       | 0.26                 | 0.795     | (0.06,35.18)  |                     |
| Other Insurance                    | No                                         | Reference       | Reference  | Reference            | Reference | Reference     |                     |
| Private Insurance                  | Yes                                        | 0.67            | 1.15       | -0.23                | 0.817     | (0.023,19.55) |                     |
| Other Insurance                    | No                                         | Reference       | Reference  | Reference            | Reference | Reference     |                     |
| Private Insurance                  | Yes                                        | 4.62            | 8.12       | 0.87                 | 0.385     | (0.15,145.95) |                     |
|                                    | Coverage                                   |                 |            |                      |           |               |                     |
| Outcome                            | Interactions (SCD*SES)                     | Factor Levels   | Odds Ratio | Linearized Std. Err. | t         | P> t          | [95%Conf. Interval] |
| # of Visits to emergency room: 2-3 | Gender                                     | Female          | Reference  | Reference            | Reference | Reference     | Reference           |
|                                    |                                            | Male            | 0.72       | 0.45                 | -0.52     | 0.603         | (0.21,2.45)         |
|                                    | Age                                        | <3              | Reference  | Reference            | Reference | Reference     | Reference           |
|                                    |                                            | 3-5             | 1.84       | 1.63                 | 0.69      | 0.490         | (0.32,10.48)        |
|                                    |                                            | 6-10            | 0.77       | 0.69                 | -0.29     | 0.770         | (0.13,4.43)         |
|                                    |                                            | 11-17           | 0.45       | 0.42                 | -0.85     | 0.395         | (0.07,2.84)         |
|                                    | Maternal Education                         | < High school   | Reference  | Reference            | Reference | Reference     | Reference           |
|                                    |                                            | High school/GED | 0.12       | 0.12                 | -2.09     | <b>0.037</b>  | (0.16,0.88)         |
|                                    |                                            | > High school   | 0.81       | 0.55                 | -0.30     | 0.761         | (0.21,3.09)         |
|                                    | Region                                     | Northeast       | Reference  | Reference            | Reference | Reference     | Reference           |
| Midwest                            |                                            | 4.67            | 5.49       | 1.31                 | 0.191     | (0.46,46.95)  |                     |

|                                    |                                            | South           | 2.47       | 2.70                 | 0.83         | 0.410           | (0.29,21.13)        |           |
|------------------------------------|--------------------------------------------|-----------------|------------|----------------------|--------------|-----------------|---------------------|-----------|
|                                    |                                            | West            | 6.42       | 10.10                | 1.18         | 0.237           | (0.29,140.52)       |           |
| Household                          | <100                                       | Reference       | Reference  | Reference            | Reference    | Reference       | Reference           |           |
| Income (% federal poverty level)   | 100 to < 200                               | 0.40            | 0.37       | -1.00                | 0.318        |                 | (0.07,2.40)         |           |
|                                    | ≥ 200                                      | 1.15            | 0.96       | 0.17                 | 0.863        |                 | (0.23,5.91)         |           |
| Race                               | Other                                      | Reference       | Reference  | Reference            | Reference    | Reference       | Reference           |           |
|                                    | Black                                      | 2.00            | 1.58       | 0.88                 | 0.380        |                 | (0.43,9.39)         |           |
| Public Insurance                   | No                                         | Reference       | Reference  | Reference            | Reference    | Reference       | Reference           |           |
|                                    | Yes                                        | 0.92            | 0.99       | -0.08                | 0.936        |                 | (0.11,7.60)         |           |
| Private Insurance                  | No                                         | Reference       | Reference  | Reference            | Reference    | Reference       | Reference           |           |
|                                    | Yes                                        | 2.68            | 3.42       | 0.78                 | 0.437        |                 | (0.22,32.54)        |           |
| Other Insurance                    | No                                         | Reference       | Reference  | Reference            | Reference    | Reference       | Reference           |           |
|                                    | Yes                                        | 1.90            | 2.53       | 0.48                 | 0.632        |                 | (0.14,26.00)        |           |
| No Insurance Coverage              | No                                         | Reference       | Reference  | Reference            | Reference    | Reference       | Reference           |           |
|                                    | Yes                                        | 0.74            | 0.98       | -0.23                | 0.821        |                 | (0.06,9.77)         |           |
| Outcome                            | Interactions (SCD*SES)                     | Factor Levels   | Odds Ratio | Linearized Std. Err. | t            | P> t            | [95%Conf. Interval] |           |
| # of Visits to emergency room: 4-5 | Gender                                     | Female          | Reference  | Reference            | Reference    | Reference       | Reference           |           |
|                                    |                                            | Male            | 0.68       | 0.47                 | -0.56        | 0.576           | (0.18,2.62)         |           |
|                                    | Age                                        | <3              | Reference  | Reference            | Reference    | Reference       | Reference           |           |
|                                    |                                            | 3-5             | 1.67       | 1.88                 | 0.46         | 0.648           | (0.18,15.21)        |           |
|                                    |                                            | 6-10            | 0.25       | 0.43                 | -0.81        | 0.417           | (0.01,7.15)         |           |
|                                    |                                            | 11-17           | 0.08       | 0.11                 | -1.74        | <b>0.083</b>    | (0.00,1.40)         |           |
|                                    | Maternal Education                         | < High school   | Reference  | Reference            | Reference    | Reference       | Reference           |           |
|                                    |                                            | High school/GED | 12.04      | 16.67                | 1.80         | <b>0.073</b>    | (0.80,182.30)       |           |
|                                    |                                            | > High school   | 1.84       | 2.56                 | 0.44         | 0.662           | (0.12,28.38)        |           |
|                                    | Region                                     | Northeast       | Reference  | Reference            | Reference    | Reference       | Reference           |           |
|                                    |                                            | Midwest         | 30.21      | 55.77                | 1.85         | <b>0.065</b>    | (0.81,1131.97)      |           |
|                                    |                                            | South           | 7.38       | 11.47                | 1.29         | 0.199           | (0.35,155.83)       |           |
|                                    |                                            | West            | -          | -                    | -            | -               | -                   |           |
|                                    | Household Income (% federal poverty level) | <100            | Reference  | Reference            | Reference    | Reference       | Reference           | Reference |
|                                    |                                            | 100 to < 200    | 10.23      | 12.70                | 1.87         | <b>0.062</b>    | (0.89,117.08)       |           |
|                                    |                                            | ≥ 200           | 1.21       | 3.45                 | 0.07         | 0.947           | (0.00,327.10)       |           |
|                                    | Race                                       | Other           | Reference  | Reference            | Reference    | Reference       | Reference           | Reference |
|                                    |                                            | Black           | 0.63       | 0.81                 | -0.36        | 0.720           | (0.05,7.73)         |           |
|                                    | Public Insurance                           | No              | Reference  | Reference            | Reference    | Reference       | Reference           | Reference |
|                                    |                                            | Yes             | 77.03      | 193.29               | 1.73         | <b>0.084</b>    | (0.56,10606.64)     |           |
| Private Insurance                  | No                                         | Reference       | Reference  | Reference            | Reference    | Reference       | Reference           |           |
|                                    | Yes                                        | 57.30           | 114.78     | 2.02                 | <b>0.044</b> | (1.12,2921.31)  |                     |           |
| Other Insurance                    | No                                         | Reference       | Reference  | Reference            | Reference    | Reference       | Reference           |           |
|                                    | Yes                                        | -               | -          | -                    | -            | -               |                     |           |
| No Insurance Coverage              | No                                         | Reference       | Reference  | Reference            | Reference    | Reference       | Reference           |           |
|                                    | Yes                                        | 439.96          | 1112.70    | 2.41                 | <b>0.016</b> | (3.07,62980.07) |                     |           |
| Outcome                            | Interactions (SCD*SES)                     | Factor Levels   | Odds Ratio | Linearized Std. Err. | t            | P> t            | [95%Conf. Interval] |           |

|                                             |                                            |                 |           |           |              |                 |               |
|---------------------------------------------|--------------------------------------------|-----------------|-----------|-----------|--------------|-----------------|---------------|
| <b># of Visits to emergency room: 6-16+</b> | Gender                                     | Female          | Reference | Reference | Reference    | Reference       | Reference     |
|                                             |                                            | Male            | 0.18      | 0.21      | -1.47        | 0.141           | (0.02,1.77)   |
|                                             | Age                                        | <3              | Reference | Reference | Reference    | Reference       | Reference     |
|                                             |                                            | 3-5             | 0.22      | 0.44      | -0.76        | <b>0.446</b>    | (0.00,11.09)  |
|                                             |                                            | 6-10            | 10.62     | 10.18     | 2.47         | <b>0.014</b>    | (1.62,69.66)  |
|                                             |                                            | 11-17           | 0.16      | 0.29      | -1.02        | 0.310           | (0.00,5.51)   |
|                                             | Maternal Education                         | < High school   | Reference | Reference | Reference    | Reference       | Reference     |
|                                             |                                            | High school/GED | 0.67      | 0.71      | -0.38        | 0.707           | (0.09,5.28)   |
|                                             |                                            | > High school   | -         | -         | -            | -               | -             |
|                                             | Region                                     | Northeast       | Reference | Reference | Reference    | Reference       | Reference     |
|                                             |                                            | Midwest         | 0.01      | 0.02      | -2.03        | <b>0.043</b>    | (0.00,0.85)   |
|                                             |                                            | South           | -         | -         | -            | -               | -             |
|                                             |                                            | West            | -         | -         | -            | -               | -             |
|                                             | Household Income (% federal poverty level) | <100            | Reference | Reference | Reference    | Reference       | Reference     |
|                                             |                                            | 100 to < 200    | 0.70      | 0.75      | -0.33        | 0.741           | (0.09,5.69)   |
|                                             |                                            | ≥ 200           | 0.59      | 0.63      | -0.49        | 0.625           | (0.07,4.85)   |
|                                             | Race                                       | Other           | Reference | Reference | Reference    | Reference       | Reference     |
|                                             |                                            | Black           | 2.24      | 1.84      | 0.98         | 0.329           | (0.44,11.29)  |
|                                             | Public Insurance                           | No              | Reference | Reference | Reference    | Reference       | Reference     |
|                                             |                                            | Yes             | 11.74     | 25.02     | 1.16         | 0.248           | (0.18,768.57) |
|                                             | Private Insurance                          | No              | Reference | Reference | Reference    | Reference       | Reference     |
| Yes                                         |                                            | 432.79          | 939.16    | 2.80      | <b>0.005</b> | (6.12,30616.45) |               |
| Other Insurance                             | No                                         | Reference       | Reference | Reference | Reference    | Reference       |               |
|                                             | Yes                                        | 96.18           | 243.07    | 1.81      | <b>0.071</b> | (0.67,13720.4)  |               |
| No Insurance Coverage                       | No                                         | Reference       | Reference | Reference | Reference    | Reference       |               |
|                                             | Yes                                        | 172.02          | 423.53    | 2.09      | <b>0.037</b> | (1.37,21587.03) |               |
