# Supplementary material
Source: HighWire-hosted journal article supplement (https://bmjopen.bmj.com/content/13/2/e069075)
Supplement: inline-supplementary-material-2 [file inline-supplementary-material-2.pdf]

### S1 File. Supplemental Figures

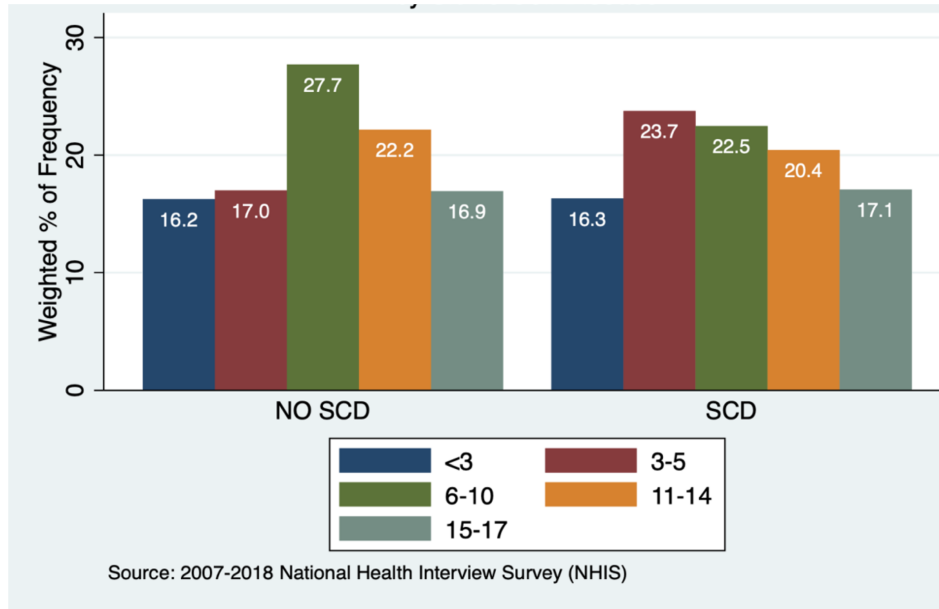

**Supplemental Fig 1.** Child Age (Years) by Sickle Cell Disease Status

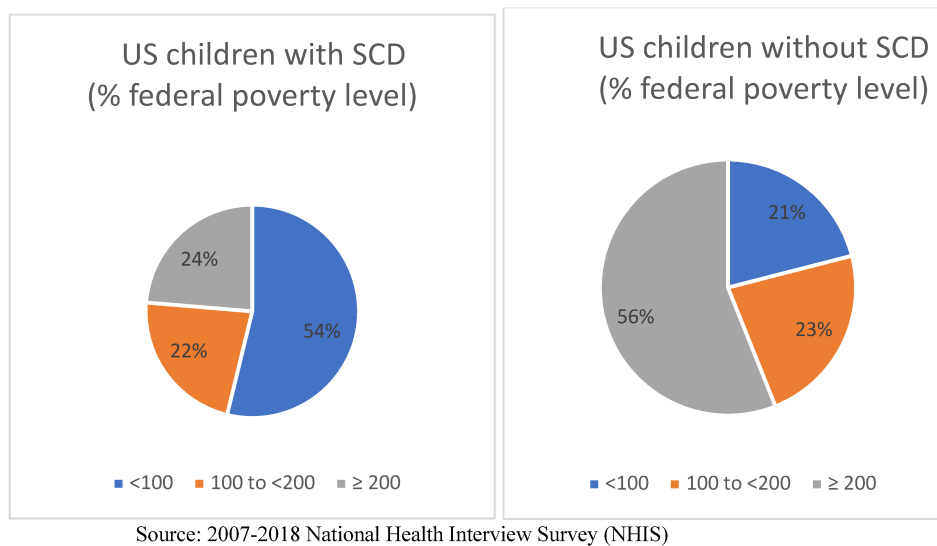

**Supplemental Fig 2.** Income by Sickle Cell Disease Status (All races)

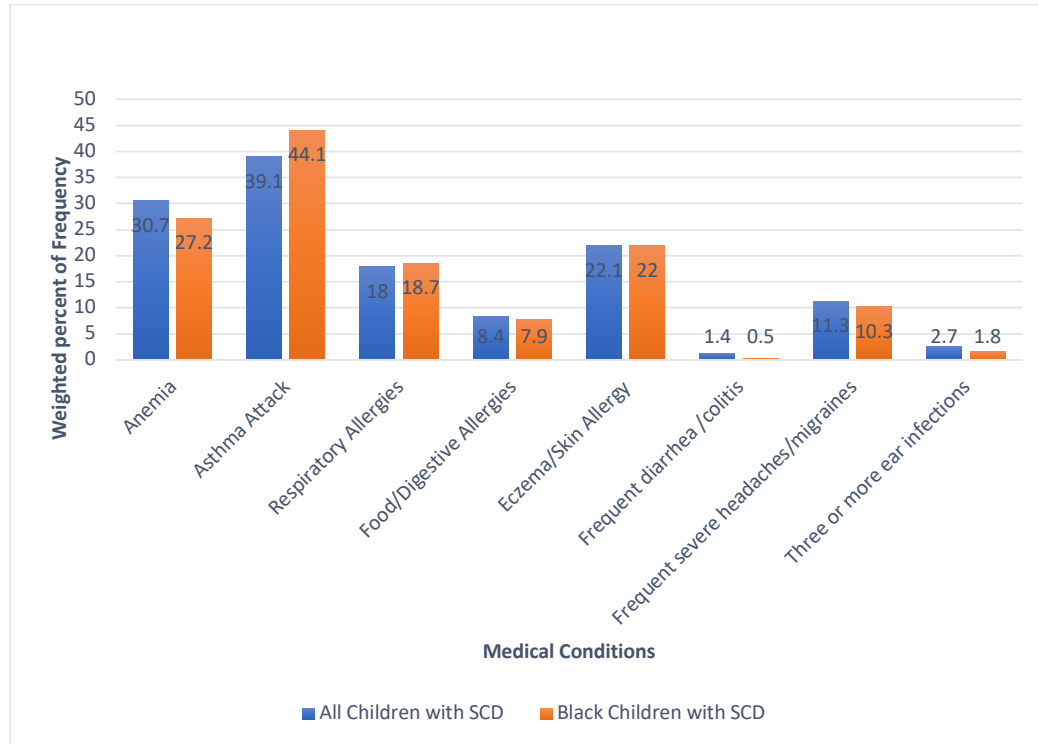

Source: 2007-2018 National Health Interview Survey (NHIS)

**Supplemental Fig 3.** Medical conditions among US children with SCD
